# Supplementary material for: dropEst: pipeline for accurate estimation of molecular counts in droplet-based single-cell RNA-seq experiments
Source: PubMed Central journal article supplement (PMC6010209; doi:10.1186/s13059-018-1449-6), 2018-06-19
Supplement: 13059_2018_1449_MOESM2_ESM.pdf [file 13059_2018_1449_MOESM2_ESM.pdf]

Table S1. Gene markers, used for annotation of the 10x Frozen BMMCs.

| <b>Cell Type</b>         | <b>Markers</b>                    |
|--------------------------|-----------------------------------|
| B cells                  | CD19, MME, MS4A1                  |
| T cells                  | CD3D                              |
| CD14+ Monocytes          | LYZ, CD14                         |
| NK cells                 | GZMA, GZMB, GNLY, NKG7            |
| Dendritic cells          | FCER1A, CST3                      |
| Monocyte progenitors     | LYZ, CD34                         |
| Epithelial cells         | EPCAM, CD226-, APOE               |
| Erythroblasts            | GYPA, CD36, TFRC                  |
| Cytotoxic T cells        | NKG7, GZMA, GZMH, GZMK            |
| T cells                  | CD3E, CD8B, IL7R                  |
| Immature B cells         | MS4A1, CD40, IL4R, IL7R-          |
| Pre-pro B cells          | CD34, CD38, MME, CD24-, IL7R-     |
| Pre B cells              | CD34-, CD40-, IL7R+, IL4R-, CD19+ |
| Non-dividing Pre B cells | CD34, IGLL5                       |

Table S2. Gene markers, used for annotation of the 10x 8k PBMCs dataset.

| <b>Cell Type</b>  | <b>Markers</b>         |
|-------------------|------------------------|
| B cells           | MS4A1                  |
| T cells           | CD3D, CD3E             |
| CD14+ Monocytes   | LYZ, CD14              |
| NK cells 1        | GNLY, NKG7             |
| NK cells 2        | GZMB, NKG7             |
| FCGR3A+ Monocytes | FCGR3A, MS4A7          |
| Dendritic cells   | FCER1A, CST3           |
| Megakaryocytes    | PPBP                   |
| Naive T cells     | CCR7                   |
| CD8 T cells       | CD8A, CD8B             |
| CD4+ T cells      | IL7R, CD4              |
| Cytotoxic T cells | NKG7, GZMA, GZMH, GZMK |

Table S3. Gene markers, used for annotation of the inDrop mouse BMCs dataset.

| <b>Cell Type</b>     | <b>Markers</b>    |
|----------------------|-------------------|
| Maturing neutrophils | Mmp9, Srgn, Cxcr2 |
| Maturing macrophages | Cd14, Ly6c2       |
| T cells              | Cd7               |
| B cells              | Cd79a, Cd79b      |
| B cells, mature      | Cd74, Cd83        |
| B cells, immature    | Vpreb1            |
| pre-B cells          | Vpreb3            |
| Progenitors          | Cd34, Kit         |
| NK cells             | Nkg7, Il2rb, Thy1 |

Table S4. Fraction of rescued cells for the 10x Frozen BMMCs dataset.

| <b>Cell type</b>  | <b>Total num. of cells</b> | <b>Num. of rescued</b> | <b>Fraction of rescued, %</b> |
|-------------------|----------------------------|------------------------|-------------------------------|
| CD14+ Monocytes   | 305                        | 164                    | 53.77                         |
| Cytotoxic T cells | 105                        | 37                     | 35.24                         |

|                          |      |     |       |
|--------------------------|------|-----|-------|
| Dendritic cells          | 90   | 16  | 17.78 |
| Epithelial cells         | 135  | 22  | 16.3  |
| Erythroblasts            | 510  | 264 | 51.76 |
| Immature B cells         | 277  | 133 | 48.01 |
| Monocyte progenitors     | 157  | 33  | 21.02 |
| NK cells                 | 179  | 47  | 26.26 |
| Non-dividing Pre B cells | 93   | 82  | 88.17 |
| Pre B cells              | 76   | 8   | 10.53 |
| Pre-pro B cells          | 65   | 30  | 46.15 |
| T cells                  | 1098 | 269 | 24.5  |

Table S5. Fraction of rescued cells for the 10x 8k PMMCs dataset.

| <b>Cell type</b>  | <b>Total num. of cells</b> | <b>Num. of rescued</b> | <b>Fraction of rescued, %</b> |
|-------------------|----------------------------|------------------------|-------------------------------|
| B cells           | 1239                       | 23                     | 1.86                          |
| CD14+ Monocytes   | 1833                       | 40                     | 2.18                          |
| CD4+ T cells      | 956                        | 15                     | 1.57                          |
| CD8 T cells       | 972                        | 16                     | 1.65                          |
| Cytotoxic T cells | 1153                       | 21                     | 1.82                          |
| Dendritic cells   | 224                        | 4                      | 1.79                          |
| FCGR3A+ Monocytes | 197                        | 0                      | 0                             |
| Megakaryocytes    | 44                         | 5                      | 11.36                         |
| Naive T cells     | 1452                       | 42                     | 2.89                          |
| NK cells 1        | 322                        | 4                      | 1.24                          |
| NK cells 2        | 69                         | 2                      | 2.9                           |

Table S6. Fraction of rescued cells for the inDrop mouse PCs dataset.

| <b>Cell type</b>   | <b>Total num. of cells</b> | <b>Num. of rescued</b> | <b>Fraction of rescued, %</b> |
|--------------------|----------------------------|------------------------|-------------------------------|
| activated stellate | 10                         | 0                      | 0                             |
| alpha              | 199                        | 18                     | 9.05                          |
| B cell             | 8                          | 0                      | 0                             |
| beta               | 623                        | 75                     | 12.04                         |
| delta              | 137                        | 6                      | 4.38                          |
| ductal             | 41                         | 2                      | 4.88                          |
| endothelial        | 68                         | 1                      | 1.47                          |
| gamma              | 29                         | 2                      | 6.9                           |
| immune other       | 4                          | 0                      | 0                             |
| macrophage         | 24                         | 5                      | 20.83                         |
| quiescent stellate | 18                         | 1                      | 5.56                          |
| schwann            | 3                          | 0                      | 0                             |
| T cell             | 3                          | 0                      | 0                             |

Table S7. Fraction of rescued cells for the inDrop mouse BMCs dataset.

| <b>Cell type</b>  | <b>Total num. of cells</b> | <b>Num. of rescued</b> | <b>Fraction of rescued, %</b> |
|-------------------|----------------------------|------------------------|-------------------------------|
| B cells, immature | 99                         | 0                      | 0                             |

|                      |      |     |      |
|----------------------|------|-----|------|
| B cells, mature      | 457  | 1   | 0.22 |
| Cycling cells        | 192  | 5   | 2.6  |
| Mast cells           | 48   | 1   | 2.08 |
| Maturing macrophages | 653  | 1   | 0.15 |
| Maturing neutrophils | 2876 | 113 | 3.93 |
| NK cells             | 61   | 0   | 0    |
| pre-B cells          | 120  | 0   | 0    |
| Progenitors          | 222  | 4   | 1.8  |
| T cells              | 82   | 1   | 1.22 |

Table S8. Runtimes of dropEst pipeline.

| Dataset                        | Phase                       | Can be parallel | Size            | #Cores | Time    |
|--------------------------------|-----------------------------|-----------------|-----------------|--------|---------|
| InDrop<br>Mouse<br>BMCs        | dropTag                     | Yes             | 244759580 reads | 1      | 1h 14m  |
|                                | dropEst                     | No              | 69420268 reads  | 1      | 27m     |
|                                | CB Merge                    | No              | 78282 CBs       | 1      | 9m 40s  |
|                                | UMI Collisions              | No              | 7619389 UMIs    | 1      | 10.0s   |
|                                | UMI Errors                  | Yes             |                 | 10     | 621.1s  |
|                                | UMI Errors<br>"directional" | Yes             |                 | 10     | 38.5s   |
|                                | Quality scoring             | No              | 6536 cells      | 1      | 11.5s   |
| InDrop<br>Mouse<br>ES<br>Cells | dropTag                     | Yes             | 413138104 reads | 1      | 1h 25m  |
|                                | dropEst                     | No              | 184395185 reads | 1      | 38m     |
|                                | CB Merge                    | No              | 90168 CBs       | 1      | 11m 20s |
|                                | UMI Collisions              | No              | 13738402 UMIs   | 1      | 10.4s   |
|                                | UMI Errors                  | Yes             |                 | 10     | 879.4s  |
|                                | UMI Errors<br>"directional" | Yes             |                 | 10     | 51.2s   |
|                                | Quality scoring             | No              | 6234 cells      | 1      | 4.7s    |

Here, processor Intel(R) Xeon(R) CPU E5-2697 v3 @ 2.60GHz was used.
