# Supplementary material for: dropEst: pipeline for accurate estimation of molecular counts in droplet-based single-cell RNA-seq experiments
Source: PubMed Central journal article supplement (PMC6010209; doi:10.1186/s13059-018-1449-6), 2018-06-19
Supplement: 13059_2018_1449_MOESM3_ESM.pdf [file 13059_2018_1449_MOESM3_ESM.pdf]

## **Supplementary Note 1: Pipeline report example**

The subsequent pages shows pipeline report (originally HTML) for the Human CD34+ 10x dataset.

# Common info

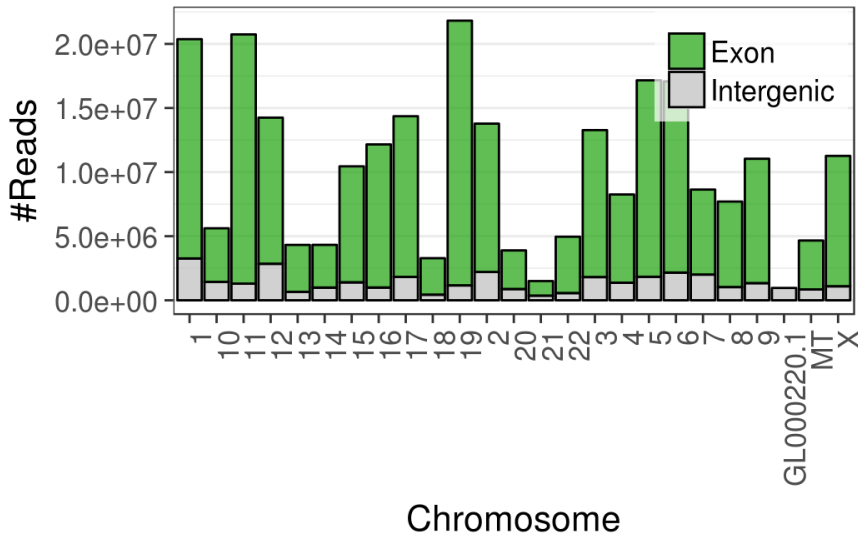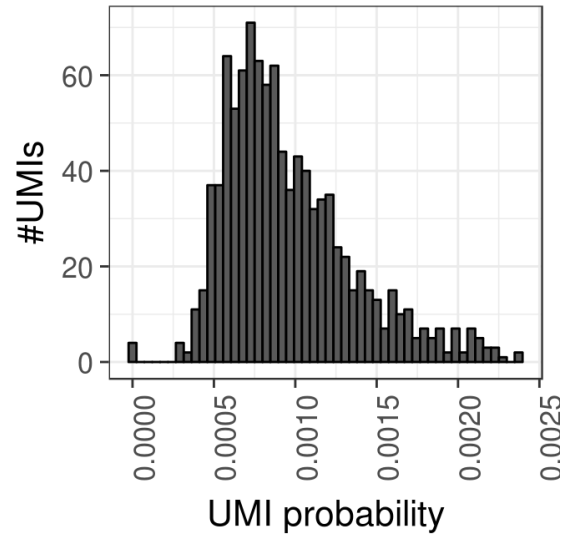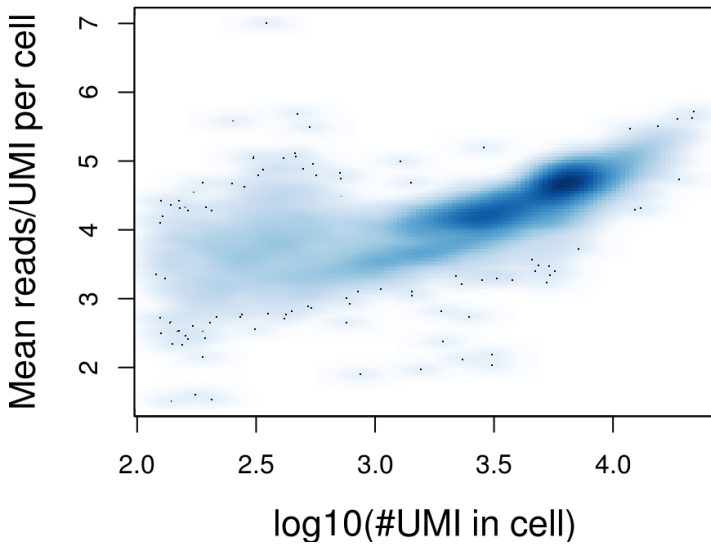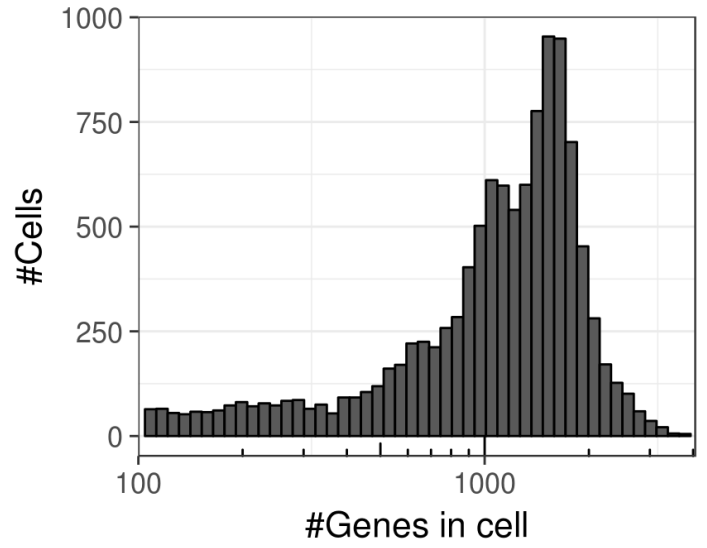

# Number of cells

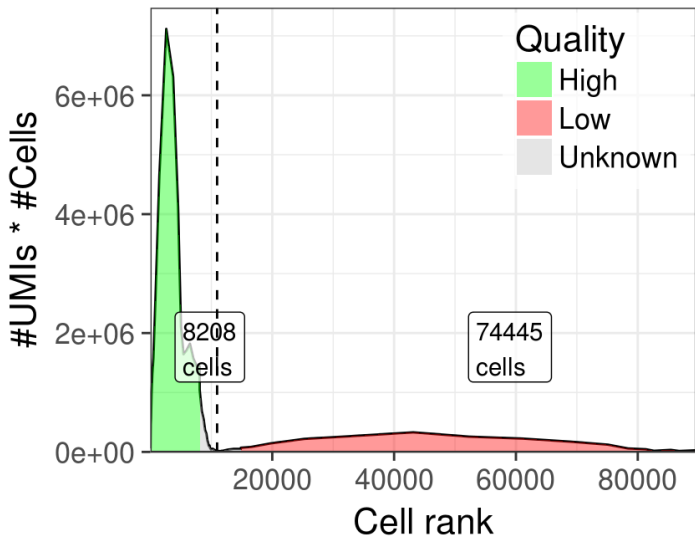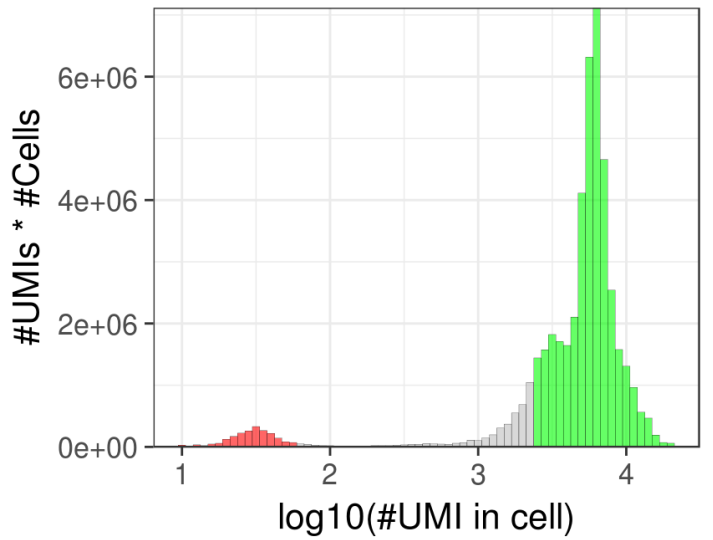

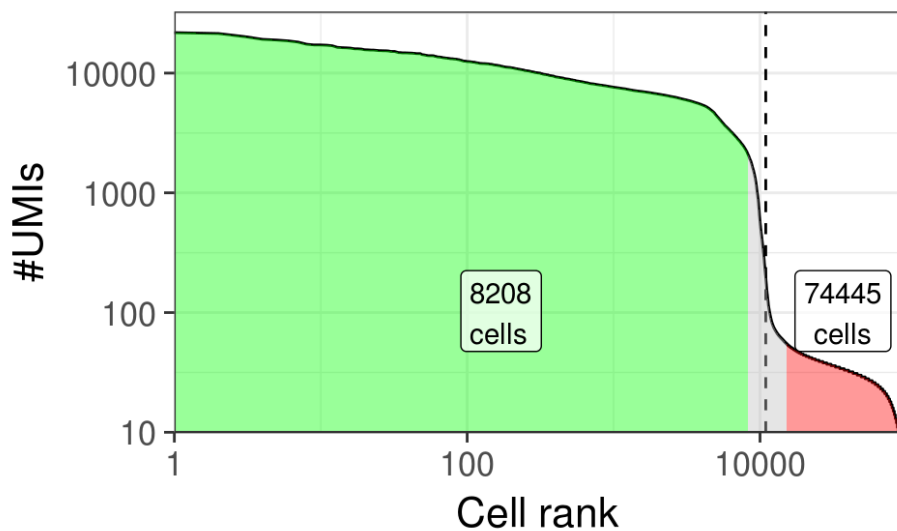

## Cells quality

Cell scores (9517 cells > 0.9)

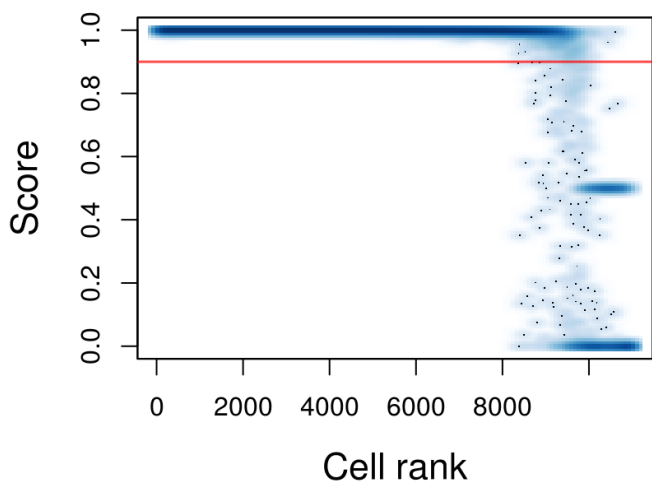

Mitochondrial fraction

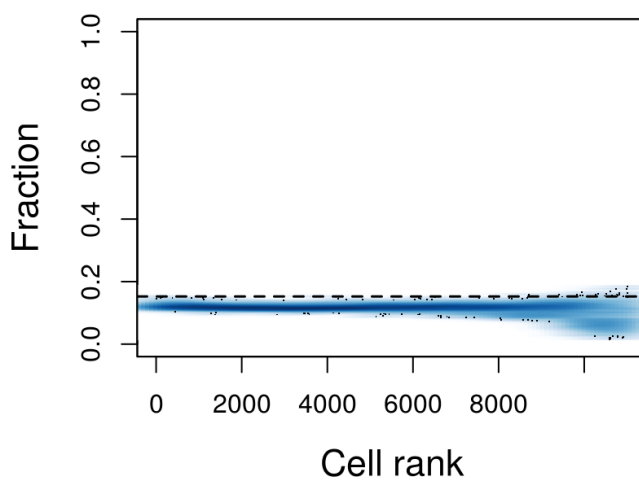

## Saturation

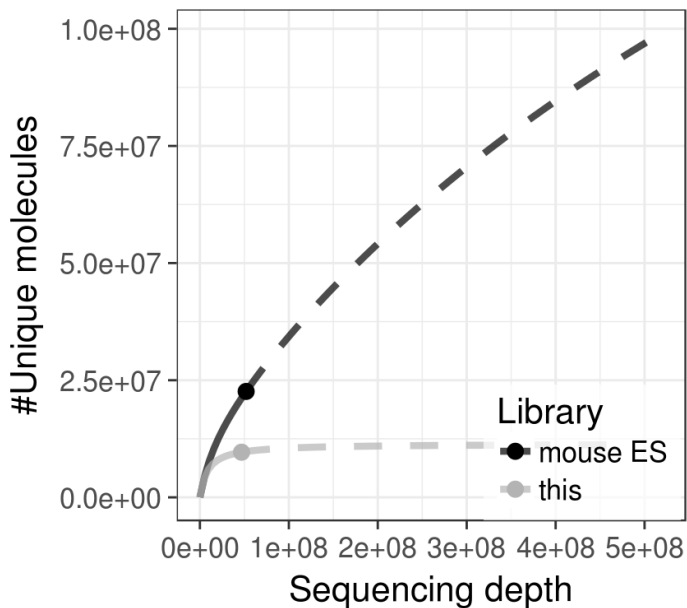

## #UMIs per gene

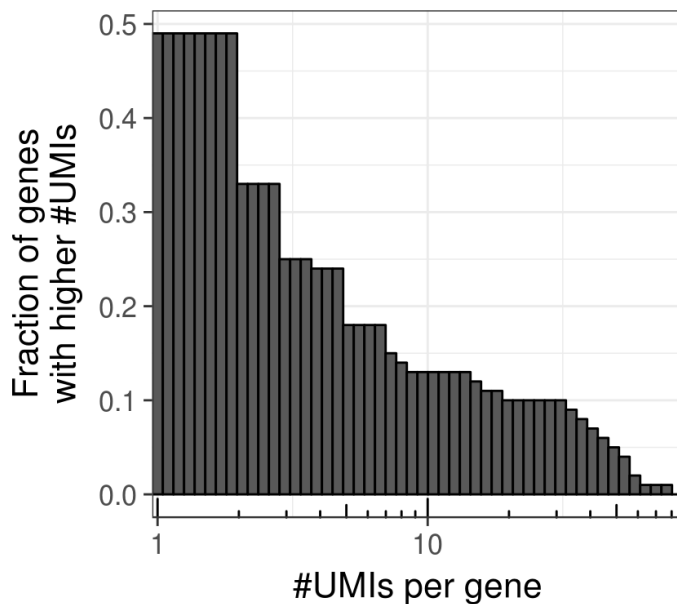

# Statistics

Top genes:

| Gene            | #Molecules |
|-----------------|------------|
| ENSG00000251562 | 712828     |
| ENSG00000140988 | 674780     |
| ENSG00000147403 | 615551     |
| ENSG00000229117 | 611132     |
| ENSG00000156508 | 543493     |
| ENSG00000167526 | 539853     |
| ENSG00000142541 | 521459     |
| ENSG00000231500 | 482001     |
| ENSG00000186468 | 468263     |
| ENSG00000137818 | 433870     |

Top UMIs:

| UMI   | #Molecules |
|-------|------------|
| CCCCG | 142694     |
| CCCGG | 138656     |
| CCGCA | 127402     |
| CCCGC | 126550     |
| ACCCG | 120526     |
| CCACA | 117245     |
| CACCA | 116685     |
| CCCAG | 116533     |
| CACCG | 116252     |
| CCCAC | 112137     |
